# Supplementary material
Source: Springer Nature journal article supplement (https://www.springermedizin.de/resource/supplementary/12888_2013_1428_MOESM3_ESM.pdf/9480192)

Change from pre-dose  
in average SKAMP-  
Attention score

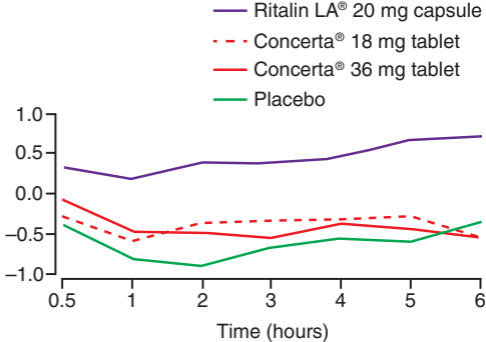

Supplement: MOESM3 [file 9480192]
